# Supplementary material
Source: publisher figshare collection journal article supplement (https://acs.figshare.com/ndownloader/files/5342353)
Supplement: Supplementary file 1 [file 5342353]

#\#CIF_1.1
 
#  CIF produced by WinGX routine CIF_UPDATE
#  Created on 2008-03-26 at 14:41:34
#  Using CIFtbx version 2.6.2 16 Jun 1998
 
#  Dictionary name : cif_core.dic
#  Dictionary vers : 2.3
#  Request file    : c:\wingx\files\archive.dat
#  CIF files read  : pre11i10 einfuegen_in_cif
 
#
#     CCDC ELECTRONIC DATA DEPOSITION FORM (CIF)
#
#     This electronic data deposition form can be used:
#
#     (a) WHEN SUBMITTING A PAPER TO A JOURNAL FOR PUBLICATION or
#     (b) WHEN SUBMITTING A PRIVATE COMMUNICATION TO THE CCDC
#
#     A comprehensive archive of CIF resources is maintained by the IUCr
#     at its Chester office. This can be accessed
#     by anonymous ftp to ftp.iucr.org
#     or via the WWW at http://www.iucr.org/cif/home.html
#     If data items in this form are not available or not applicable
#     then ignore these items
#     A few items specific to CCDC input are indicated by _ccdc_
#
#     Submission and help information is provided at the end of this form
#-------------------------------------------------------------------------
#1    Global data block identification for start of deposition
 
data_global
 
#
#-------------------------------------------------------------------------
#2    Person making the deposition
#
_publ_contact_author               'W�rle M.'
_publ_contact_author_email          woerle@inorg.chem.ethz.ch
 
#-------------------------------------------------------------------------
#3    Publication details
#
#     Provide these details if the structure has been published,
#     accepted or submitted for publication
#
#     The CCDC journal deposition number, eg. 182/357,
#     should be included only if it has been assigned by the journal
#
loop_
_publ_author_name
 
'Gruber, Stefan'
'Zaitsev, Alexey B.'
'W�rle, Michael'
'Pregosin, Paul S.'
 
_journal_name_full                 'Organometallics'
_journal_volume                    ?
_journal_page_first                ?
_journal_page_last                 ?
_journal_year                      ?
_ccdc_journal_depnumber            ?
#
#-------------------------------------------------------------------------
#4    Chemical and physical data
#
#     Note that the units for melting point are Kelvin
#     The compound_id is the identifier for the compound in the published
#       paper, eg. 4a, II, etc.
#     Provide a brief description of any significant biological activity,
#       eg. antimalarial activity
#     If the compound exhibits polymorphism provide brief details,
#       eg. monoclinic form, low-temperature phase, etc.
#     For chemdiag  leave blank - no longer necessary
 
_ccdc_compound_id                  13
_ccdc_biological_activity          ?
_ccdc_polymorph                    ?
 
_ccdc_chemdiag_type                ?
_ccdc_chemdiag_records
;
?
;
#
#-------------------------------------------------------------------------
#5    Other data relating to the structure determination and refinement
#
#     Record the radiation type if not X-rays, eg. neutron
#     Record the temperature of the data collection (Kelvin)
#       if not room-temperature
#     Record R_squared if this is the only reliability factor given by
#       your refinement program
#     Describe briefly any disorder, eg. t-Butyl C31-33 disordered over
#       two sites with occupancies 0.6 and 0.4
#     Under ccdc_comments record any other important information
 
_ccdc_temp_data_collection          233
_ccdc_ls_R_squared                  ?
_ccdc_disorder                      ?
_ccdc_comments
;
?
;
#-------------------------------------------------------------------------
#6    Include your "standard" CIF file here
#     It should contain the following data items:
#       unit cell parameters and volume, z value, space group symbol,
#       R-factor(s), atomic coordinates with standard deviations,
#       occupancy factors, bond lengths and bond angles
#     Other data items may be present but will not necessarily be
#       included in the Cambridge Structural Database
#
#     Do NOT include structure factors
#
#
#-------------------------------------------------------------------------
#SUBMISSION INFORMATION
#
#     For a journal send the form to the address specified by the journal
#
#     For a private communication to the CCDC send the form to the address
#       deposit@ccdc.cam.ac.uk
#
#     For up-to-date information on deposition procedures, check the website
#       http://www.ccdc.cam.ac.uk/
 
data_pre11i10
 
_audit_creation_date                    2008-03-26T14:41:34-00:00
_audit_creation_method                  'WinGX routine CIF_UPDATE'
 
#----------------------------------------------------------------------------#
#                   CHEMICAL INFORMATION                                     #
#----------------------------------------------------------------------------#
 
_chemical_name_systematic
;
 ?
;
_chemical_formula_moiety                'C17 H25 O2 Ru, F6 P'
_chemical_formula_sum                   'C17 H25 F6 O2 P Ru'
_chemical_formula_weight                507.41
_chemical_absolute_configuration        unk
 
#----------------------------------------------------------------------------#
#                   UNIT CELL INFORMATION                                    #
#----------------------------------------------------------------------------#
 
_symmetry_cell_setting                  monoclinic
_symmetry_space_group_name_H-M          P2(1)
loop_
    _symmetry_equiv_pos_as_xyz
'x, y, z'
'-x, y+1/2, -z'
 
_cell_length_a                          9.0768(7)
_cell_length_b                          8.3752(6)
_cell_length_c                          13.2634(9)
_cell_angle_alpha                       90
_cell_angle_beta                        95.8600(10)
_cell_angle_gamma                       90
_cell_volume                            1003.01(13)
_cell_formula_units_Z                   2
_cell_measurement_temperature           233(2)
_cell_measurement_reflns_used           913
_cell_measurement_theta_min             3.09
_cell_measurement_theta_max             25.41
 
#----------------------------------------------------------------------------#
#                   CRYSTAL INFORMATION                                      #
#----------------------------------------------------------------------------#
 
_exptl_crystal_description              plate
_exptl_crystal_colour                   orange
_exptl_crystal_size_max                 0.4
_exptl_crystal_size_mid                 0.34
_exptl_crystal_size_min                 0.05
_exptl_crystal_density_diffrn           1.68
_exptl_crystal_density_method           'not measured'
_exptl_crystal_F_000                    512
_exptl_special_details
;
 ?
;
 
#----------------------------------------------------------------------------#
#                   ABSORPTION CORRECTION                                    #
#----------------------------------------------------------------------------#
 
_exptl_absorpt_coefficient_mu           0.924
_exptl_absorpt_correction_type          empirical
_exptl_absorpt_process_details          'SADABS, Bruker V2.05'
_exptl_absorpt_correction_T_min         0.7088
_exptl_absorpt_correction_T_max         0.9552
 
#----------------------------------------------------------------------------#
#                   DATA COLLECTION                                          #
#----------------------------------------------------------------------------#
 
_diffrn_ambient_temperature             233(2)
_diffrn_radiation_wavelength            0.71073
_diffrn_radiation_type                  MoK\a
_diffrn_radiation_monochromator         graphite
_diffrn_measurement_device_type         'SMART PLATFORM, CCD Detector'
_diffrn_measurement_method              '\w scans'
_diffrn_reflns_av_R_equivalents         0.0247
_diffrn_reflns_av_unetI/netI            0.0456
_diffrn_reflns_number                   7597
_diffrn_reflns_limit_h_min              -13
_diffrn_reflns_limit_h_max              13
_diffrn_reflns_limit_k_min              -12
_diffrn_reflns_limit_k_max              13
_diffrn_reflns_limit_l_min              -20
_diffrn_reflns_limit_l_max              20
_diffrn_reflns_theta_min                1.54
_diffrn_reflns_theta_max                33.57
_diffrn_reflns_theta_full               33.57
_diffrn_measured_fraction_theta_full
                                        0.471
_diffrn_measured_fraction_theta_max
                                        0.471
_reflns_number_total                    3582
_reflns_number_gt                       2817
_reflns_threshold_expression            >2sigma(I)
 
#----------------------------------------------------------------------------#
#                   COMPUTER PROGRAMS USED                                   #
#----------------------------------------------------------------------------#
 
_computing_structure_refinement         'SHELXL-97 (Sheldrick, 1997)'
 
#----------------------------------------------------------------------------#
#                   REFINEMENT INFORMATION                                   #
#----------------------------------------------------------------------------#
 
_refine_special_details
;
 Refinement of F^2^ against ALL reflections.  The weighted R-factor wR and
 goodness of fit S are based on F^2^, conventional R-factors R are based
 on F, with F set to zero for negative F^2^. The threshold expression of
 F^2^ > 2sigma(F^2^) is used only for calculating R-factors(gt) etc. and is
 not relevant to the choice of reflections for refinement.  R-factors based
 on F^2^ are statistically about twice as large as those based on F, and R-
 factors based on ALL data will be even larger.
;
_refine_ls_structure_factor_coef        Fsqd
_refine_ls_matrix_type                  full
_refine_ls_weighting_scheme             calc
_refine_ls_weighting_details
         'calc w=1/[\s^2^(Fo^2^)+(0.0349P)^2^+0.0744P] where P=(Fo^2^+2Fc^2^)/3'
_atom_sites_solution_primary            direct
_atom_sites_solution_secondary          difmap
_atom_sites_solution_hydrogens          geom
_refine_ls_hydrogen_treatment           constr
_refine_ls_extinction_method            none
_refine_ls_number_reflns                3582
_refine_ls_number_parameters            250
_refine_ls_number_restraints            1
_refine_ls_R_factor_all                 0.0558
_refine_ls_R_factor_gt                  0.035
_refine_ls_wR_factor_ref                0.0744
_refine_ls_wR_factor_gt                 0.069
_refine_ls_goodness_of_fit_ref          1.018
_refine_ls_restrained_S_all             1.018
_refine_ls_shift/su_max                 0.041
_refine_ls_shift/su_mean                0.002
_refine_ls_abs_structure_details
                                    'Flack H D (1983), Acta Cryst. A39, 876-881'
_refine_ls_abs_structure_Flack          -0.06(4)
_refine_diff_density_max                0.304
_refine_diff_density_min                -0.317
_refine_diff_density_rms                0.062
 
#----------------------------------------------------------------------------#
#                   ATOMIC TYPES, COORDINATES AND THERMAL PARAMETERS         #
#----------------------------------------------------------------------------#
 
loop_
    _atom_type_symbol
    _atom_type_description
    _atom_type_scat_dispersion_real
    _atom_type_scat_dispersion_imag
    _atom_type_scat_source
C C 0.0033 0.0016 'International Tables Vol C Tables 4.2.6.8 and 6.1.1.4'
H H 0 0 'International Tables Vol C Tables 4.2.6.8 and 6.1.1.4'
F F 0.0171 0.0103 'International Tables Vol C Tables 4.2.6.8 and 6.1.1.4'
P P 0.1023 0.0942 'International Tables Vol C Tables 4.2.6.8 and 6.1.1.4'
Ru Ru -1.2594 0.8363 'International Tables Vol C Tables 4.2.6.8 and 6.1.1.4'
O O 0.0106 0.006 'International Tables Vol C Tables 4.2.6.8 and 6.1.1.4'
 
loop_
    _atom_site_label
    _atom_site_type_symbol
    _atom_site_fract_x
    _atom_site_fract_y
    _atom_site_fract_z
    _atom_site_U_iso_or_equiv
    _atom_site_adp_type
    _atom_site_occupancy
    _atom_site_symmetry_multiplicity
    _atom_site_calc_flag
    _atom_site_refinement_flags
    _atom_site_disorder_assembly
    _atom_site_disorder_group
Ru1 Ru 0.20540(4) 0.24845(5) 0.23797(3) 0.02878(9) Uani 1 1 d . . .
P1 P 0.73697(18) 0.7718(3) 0.28266(14) 0.0423(5) Uani 1 1 d . . .
F1 F 0.7097(6) 0.6023(5) 0.2312(4) 0.0850(14) Uani 1 1 d . . .
F2 F 0.8819(7) 0.7861(12) 0.2303(5) 0.169(4) Uani 1 1 d . . .
F3 F 0.6549(12) 0.8485(8) 0.1882(5) 0.166(4) Uani 1 1 d . . .
F4 F 0.8286(12) 0.6912(12) 0.3736(7) 0.156(4) Uani 1 1 d . . .
F5 F 0.7651(8) 0.9386(6) 0.3375(4) 0.093(2) Uani 1 1 d . . .
F6 F 0.5876(7) 0.7605(14) 0.3311(6) 0.157(3) Uani 1 1 d . . .
O1 O 0.4028(3) 0.2524(9) 0.1615(2) 0.0432(6) Uani 1 1 d . . .
O2 O 0.2216(4) 0.0886(5) 0.1138(3) 0.0476(8) Uani 1 1 d . . .
C1 C 0.1511(9) 0.0303(9) 0.3180(6) 0.050(2) Uani 1 1 d . . .
H1A H 0.086 0.0995 0.3474 0.075 Uiso 1 1 calc R . .
H1B H 0.1138 -0.0596 0.2813 0.075 Uiso 1 1 calc R . .
C2 C 0.3045(8) 0.0611(8) 0.3290(5) 0.0411(13) Uani 1 1 d . . .
H2A H 0.3732 -0.0051 0.3008 0.062 Uiso 1 1 calc R . .
C3 C 0.3462(7) 0.1979(11) 0.3850(5) 0.0380(14) Uani 1 1 d . . .
H3A H 0.2771 0.251 0.4213 0.057 Uiso 1 1 calc R . .
C4 C 0.5016(5) 0.2596(12) 0.3871(3) 0.0487(11) Uani 1 1 d . . .
H4A H 0.563 0.2238 0.3389 0.073 Uiso 1 1 calc R . .
C5 C 0.5530(6) 0.3657(8) 0.4576(4) 0.0605(15) Uani 1 1 d . . .
H5A H 0.4916 0.4016 0.5059 0.091 Uiso 1 1 calc R . .
H5B H 0.6504 0.4042 0.4588 0.091 Uiso 1 1 calc R . .
C10 C 0.0650(6) 0.4137(6) 0.1409(4) 0.0415(10) Uani 1 1 d . . .
C11 C 0.0500(9) 0.4035(8) 0.0280(5) 0.0618(17) Uani 1 1 d . . .
H11A H 0.0107 0.2996 0.007 0.093 Uiso 1 1 calc R . .
H11B H 0.1463 0.4179 0.0037 0.093 Uiso 1 1 calc R . .
H11C H -0.0169 0.4862 0 0.093 Uiso 1 1 calc R . .
C20 C 0.1682(5) 0.5078(6) 0.2016(4) 0.0390(9) Uani 1 1 d . . .
C21 C 0.2817(7) 0.6186(7) 0.1632(5) 0.0615(15) Uani 1 1 d . . .
H21A H 0.2455 0.657 0.0962 0.092 Uiso 1 1 calc R . .
H21B H 0.3739 0.5614 0.1597 0.092 Uiso 1 1 calc R . .
H21C H 0.2984 0.7086 0.209 0.092 Uiso 1 1 calc R . .
C30 C 0.1462(8) 0.4818(8) 0.3052(6) 0.0398(15) Uani 1 1 d . . .
C31 C 0.2225(7) 0.5729(7) 0.3927(4) 0.0569(14) Uani 1 1 d . . .
H31A H 0.3261 0.5867 0.3827 0.085 Uiso 1 1 calc R . .
H31B H 0.2146 0.5142 0.4549 0.085 Uiso 1 1 calc R . .
H31C H 0.1761 0.6767 0.397 0.085 Uiso 1 1 calc R . .
C40 C 0.0279(6) 0.3755(6) 0.3096(4) 0.0410(11) Uani 1 1 d . . .
C41 C -0.0423(8) 0.3292(8) 0.4026(5) 0.0646(16) Uani 1 1 d . . .
H41A H -0.0986 0.2316 0.3896 0.097 Uiso 1 1 calc R . .
H41B H -0.1079 0.4138 0.4203 0.097 Uiso 1 1 calc R . .
H41C H 0.0341 0.312 0.4582 0.097 Uiso 1 1 calc R . .
C50 C -0.0236(5) 0.3287(5) 0.2068(4) 0.0385(10) Uani 1 1 d . . .
C51 C -0.1560(6) 0.2286(10) 0.1722(5) 0.0592(16) Uani 1 1 d . . .
H51A H -0.1476 0.1905 0.104 0.089 Uiso 1 1 calc R . .
H51B H -0.2451 0.2924 0.1728 0.089 Uiso 1 1 calc R . .
H51C H -0.1609 0.1383 0.2175 0.089 Uiso 1 1 calc R . .
C60 C 0.3503(6) 0.1441(6) 0.1005(3) 0.0442(11) Uani 1 1 d . . .
C61 C 0.4383(9) 0.0835(10) 0.0199(5) 0.0686(18) Uani 1 1 d . . .
H61A H 0.4054 0.1354 -0.0439 0.103 Uiso 1 1 calc R . .
H61B H 0.4245 -0.0309 0.0128 0.103 Uiso 1 1 calc R . .
H61C H 0.5423 0.1066 0.0381 0.103 Uiso 1 1 calc R . .
 
loop_
    _atom_site_aniso_label
    _atom_site_aniso_U_11
    _atom_site_aniso_U_22
    _atom_site_aniso_U_33
    _atom_site_aniso_U_23
    _atom_site_aniso_U_13
    _atom_site_aniso_U_12
Ru1 0.02745(14) 0.02909(15) 0.02956(18) 0.0003(3) 0.00182(11) 0.0014(3)
P1 0.0465(8) 0.0337(13) 0.0463(7) -0.0040(7) 0.0023(6) -0.0025(6)
F1 0.114(4) 0.053(2) 0.086(3) -0.025(2) 0.001(3) -0.007(2)
F2 0.113(4) 0.193(10) 0.220(7) -0.104(8) 0.102(5) -0.093(6)
F3 0.263(11) 0.098(5) 0.113(5) 0.003(4) -0.098(6) 0.028(5)
F4 0.232(10) 0.102(7) 0.116(6) -0.005(5) -0.069(5) 0.056(6)
F5 0.150(6) 0.046(3) 0.083(3) -0.020(2) 0.019(4) -0.023(3)
F6 0.116(4) 0.154(5) 0.219(7) -0.081(8) 0.100(5) -0.069(7)
O1 0.0378(13) 0.0509(16) 0.0424(14) 0.003(3) 0.0120(11) 0.007(3)
O2 0.050(2) 0.0464(19) 0.0446(18) -0.0121(16) -0.0050(16) 0.0049(16)
C1 0.049(4) 0.037(3) 0.063(4) 0.014(3) 0.002(4) 0.001(3)
C2 0.045(3) 0.037(3) 0.040(3) 0.006(2) -0.005(2) 0.012(2)
C3 0.037(2) 0.048(4) 0.026(2) 0.005(2) -0.0072(18) 0.016(2)
C4 0.0343(18) 0.066(3) 0.044(2) -0.011(4) -0.0044(15) 0.005(4)
C5 0.043(3) 0.080(4) 0.056(3) -0.017(3) -0.005(2) -0.005(3)
C10 0.043(2) 0.039(2) 0.040(2) 0.007(2) -0.005(2) 0.006(2)
C11 0.082(4) 0.065(4) 0.036(3) 0.023(3) -0.008(3) 0.011(3)
C20 0.038(2) 0.031(2) 0.048(2) 0.0048(19) 0.0031(19) 0.0038(17)
C21 0.064(3) 0.042(3) 0.081(4) 0.012(3) 0.019(3) -0.013(3)
C30 0.035(3) 0.035(3) 0.049(3) -0.008(3) 0.003(3) 0.010(3)
C31 0.066(3) 0.044(3) 0.057(3) -0.017(2) -0.010(3) 0.007(2)
C40 0.043(3) 0.033(2) 0.049(3) 0.001(2) 0.011(2) 0.0049(19)
C41 0.067(4) 0.063(4) 0.070(4) 0.004(3) 0.038(3) 0.010(3)
C50 0.027(2) 0.038(2) 0.049(3) 0.0011(19) -0.0033(18) 0.0022(17)
C51 0.039(2) 0.050(4) 0.086(3) 0.007(4) -0.006(2) -0.007(3)
C60 0.048(3) 0.052(3) 0.033(2) -0.004(2) 0.0025(19) 0.014(2)
C61 0.077(4) 0.084(5) 0.047(3) -0.003(4) 0.015(3) 0.023(4)
 
 
#----------------------------------------------------------------------------#
#                   MOLECULAR GEOMETRY                                       #
#----------------------------------------------------------------------------#
 
_geom_special_details
;
 All esds (except the esd in the dihedral angle between two l.s. planes)
 are estimated using the full covariance matrix.  The cell esds are taken
 into account individually in the estimation of esds in distances, angles
 and torsion angles; correlations between esds in cell parameters are only
 used when they are defined by crystal symmetry.  An approximate (isotropic)
 treatment of cell esds is used for estimating esds involving l.s. planes.
;
loop_
    _geom_bond_atom_site_label_1
    _geom_bond_atom_site_label_2
    _geom_bond_distance
    _geom_bond_site_symmetry_2
    _geom_bond_publ_flag
Ru1 C2 2.123(6) . ?
Ru1 O2 2.139(4) . ?
Ru1 O1 2.147(3) . ?
Ru1 C50 2.183(4) . ?
Ru1 C1 2.195(8) . ?
Ru1 C10 2.205(5) . ?
Ru1 C40 2.223(5) . ?
Ru1 C30 2.236(7) . ?
Ru1 C20 2.243(5) . ?
Ru1 C3 2.260(7) . ?
Ru1 C60 2.511(5) . ?
P1 F3 1.532(6) . ?
P1 F4 1.549(8) . ?
P1 F2 1.554(5) . ?
P1 F6 1.561(5) . ?
P1 F5 1.583(6) . ?
P1 F1 1.584(4) . ?
O1 C60 1.275(7) . ?
O2 C60 1.285(7) . ?
C1 C2 1.409(12) . ?
C1 H1A 0.94 . ?
C1 H1B 0.94 . ?
C2 C3 1.397(12) . ?
C2 H2A 0.94 . ?
C3 C4 1.500(9) . ?
C3 H3A 0.94 . ?
C4 C5 1.338(9) . ?
C4 H4A 0.94 . ?
C5 H5A 0.94 . ?
C5 H5B 0.94 . ?
C10 C20 1.412(7) . ?
C10 C50 1.435(7) . ?
C10 C11 1.492(8) . ?
C11 H11A 0.97 . ?
C11 H11B 0.97 . ?
C11 H11C 0.97 . ?
C20 C30 1.425(9) . ?
C20 C21 1.513(7) . ?
C21 H21A 0.97 . ?
C21 H21B 0.97 . ?
C21 H21C 0.97 . ?
C30 C40 1.401(9) . ?
C30 C31 1.498(9) . ?
C31 H31A 0.97 . ?
C31 H31B 0.97 . ?
C31 H31C 0.97 . ?
C40 C50 1.449(7) . ?
C40 C41 1.497(7) . ?
C41 H41A 0.97 . ?
C41 H41B 0.97 . ?
C41 H41C 0.97 . ?
C50 C51 1.498(7) . ?
C51 H51A 0.97 . ?
C51 H51B 0.97 . ?
C51 H51C 0.97 . ?
C60 C61 1.488(8) . ?
C61 H61A 0.97 . ?
C61 H61B 0.97 . ?
C61 H61C 0.97 . ?
 
loop_
    _geom_angle_atom_site_label_1
    _geom_angle_atom_site_label_2
    _geom_angle_atom_site_label_3
    _geom_angle
    _geom_angle_site_symmetry_1
    _geom_angle_site_symmetry_3
    _geom_angle_publ_flag
C2 Ru1 O2 85.2(2) . . ?
C2 Ru1 O1 87.4(3) . . ?
O2 Ru1 O1 61.29(19) . . ?
C2 Ru1 C50 132.4(2) . . ?
O2 Ru1 C50 100.71(16) . . ?
O1 Ru1 C50 136.90(17) . . ?
C2 Ru1 C1 38.0(3) . . ?
O2 Ru1 C1 83.6(3) . . ?
O1 Ru1 C1 118.7(3) . . ?
C50 Ru1 C1 95.2(2) . . ?
C2 Ru1 C10 169.1(2) . . ?
O2 Ru1 C10 91.39(16) . . ?
O1 Ru1 C10 100.09(19) . . ?
C50 Ru1 C10 38.18(19) . . ?
C1 Ru1 C10 131.3(2) . . ?
C2 Ru1 C40 113.2(2) . . ?
O2 Ru1 C40 137.59(17) . . ?
O1 Ru1 C40 150.5(2) . . ?
C50 Ru1 C40 38.38(19) . . ?
C1 Ru1 C40 89.0(3) . . ?
C10 Ru1 C40 63.14(19) . . ?
C2 Ru1 C30 121.6(3) . . ?
O2 Ru1 C30 153.1(2) . . ?
O1 Ru1 C30 114.9(3) . . ?
C50 Ru1 C30 62.8(2) . . ?
C1 Ru1 C30 117.4(2) . . ?
C10 Ru1 C30 62.4(2) . . ?
C40 Ru1 C30 36.6(2) . . ?
C2 Ru1 C20 152.1(2) . . ?
O2 Ru1 C20 117.45(16) . . ?
O1 Ru1 C20 89.9(2) . . ?
C50 Ru1 C20 62.73(17) . . ?
C1 Ru1 C20 150.9(3) . . ?
C10 Ru1 C20 37.00(18) . . ?
C40 Ru1 C20 61.88(19) . . ?
C30 Ru1 C20 37.1(2) . . ?
C2 Ru1 C3 37.0(3) . . ?
O2 Ru1 C3 118.0(2) . . ?
O1 Ru1 C3 89.14(18) . . ?
C50 Ru1 C3 131.6(2) . . ?
C1 Ru1 C3 64.0(3) . . ?
C10 Ru1 C3 149.7(3) . . ?
C40 Ru1 C3 95.2(2) . . ?
C30 Ru1 C3 87.6(3) . . ?
C20 Ru1 C3 115.2(3) . . ?
C2 Ru1 C60 86.2(2) . . ?
O2 Ru1 C60 30.78(16) . . ?
O1 Ru1 C60 30.51(19) . . ?
C50 Ru1 C60 121.91(17) . . ?
C1 Ru1 C60 102.8(3) . . ?
C10 Ru1 C60 96.25(17) . . ?
C40 Ru1 C60 158.87(17) . . ?
C30 Ru1 C60 139.3(2) . . ?
C20 Ru1 C60 105.04(18) . . ?
C3 Ru1 C60 105.6(2) . . ?
F3 P1 F4 176.1(6) . . ?
F3 P1 F2 88.0(6) . . ?
F4 P1 F2 88.3(6) . . ?
F3 P1 F6 89.5(6) . . ?
F4 P1 F6 94.2(6) . . ?
F2 P1 F6 177.5(6) . . ?
F3 P1 F5 92.8(4) . . ?
F4 P1 F5 88.8(5) . . ?
F2 P1 F5 91.9(4) . . ?
F6 P1 F5 88.3(4) . . ?
F3 P1 F1 88.9(4) . . ?
F4 P1 F1 89.6(4) . . ?
F2 P1 F1 88.8(4) . . ?
F6 P1 F1 91.1(4) . . ?
F5 P1 F1 178.2(3) . . ?
C60 O1 Ru1 90.7(3) . . ?
C60 O2 Ru1 90.8(3) . . ?
C2 C1 Ru1 68.2(4) . . ?
C2 C1 H1A 120 . . ?
Ru1 C1 H1A 82.4 . . ?
C2 C1 H1B 120 . . ?
Ru1 C1 H1B 120.2 . . ?
H1A C1 H1B 120 . . ?
C3 C2 C1 114.6(7) . . ?
C3 C2 Ru1 76.8(4) . . ?
C1 C2 Ru1 73.7(4) . . ?
C3 C2 H2A 122.7 . . ?
C1 C2 H2A 122.7 . . ?
Ru1 C2 H2A 118 . . ?
C2 C3 C4 119.7(6) . . ?
C2 C3 Ru1 66.2(4) . . ?
C4 C3 Ru1 113.5(4) . . ?
C2 C3 H3A 120.1 . . ?
C4 C3 H3A 120.1 . . ?
Ru1 C3 H3A 90.3 . . ?
C5 C4 C3 120.1(5) . . ?
C5 C4 H4A 119.9 . . ?
C3 C4 H4A 119.9 . . ?
C4 C5 H5A 120 . . ?
C4 C5 H5B 120 . . ?
H5A C5 H5B 120 . . ?
C20 C10 C50 108.1(4) . . ?
C20 C10 C11 126.2(5) . . ?
C50 C10 C11 125.7(5) . . ?
C20 C10 Ru1 73.0(3) . . ?
C50 C10 Ru1 70.1(3) . . ?
C11 C10 Ru1 122.6(4) . . ?
C10 C11 H11A 109.5 . . ?
C10 C11 H11B 109.5 . . ?
H11A C11 H11B 109.5 . . ?
C10 C11 H11C 109.5 . . ?
H11A C11 H11C 109.5 . . ?
H11B C11 H11C 109.5 . . ?
C10 C20 C30 108.3(5) . . ?
C10 C20 C21 125.8(5) . . ?
C30 C20 C21 125.9(5) . . ?
C10 C20 Ru1 70.0(3) . . ?
C30 C20 Ru1 71.2(3) . . ?
C21 C20 Ru1 125.0(4) . . ?
C20 C21 H21A 109.5 . . ?
C20 C21 H21B 109.5 . . ?
H21A C21 H21B 109.5 . . ?
C20 C21 H21C 109.5 . . ?
H21A C21 H21C 109.5 . . ?
H21B C21 H21C 109.5 . . ?
C40 C30 C20 108.7(5) . . ?
C40 C30 C31 126.0(7) . . ?
C20 C30 C31 124.7(6) . . ?
C40 C30 Ru1 71.2(3) . . ?
C20 C30 Ru1 71.7(3) . . ?
C31 C30 Ru1 130.0(5) . . ?
C30 C31 H31A 109.5 . . ?
C30 C31 H31B 109.5 . . ?
H31A C31 H31B 109.5 . . ?
C30 C31 H31C 109.5 . . ?
H31A C31 H31C 109.5 . . ?
H31B C31 H31C 109.5 . . ?
C30 C40 C50 107.9(5) . . ?
C30 C40 C41 126.3(6) . . ?
C50 C40 C41 125.6(5) . . ?
C30 C40 Ru1 72.2(4) . . ?
C50 C40 Ru1 69.3(3) . . ?
C41 C40 Ru1 128.1(4) . . ?
C40 C41 H41A 109.5 . . ?
C40 C41 H41B 109.5 . . ?
H41A C41 H41B 109.5 . . ?
C40 C41 H41C 109.5 . . ?
H41A C41 H41C 109.5 . . ?
H41B C41 H41C 109.5 . . ?
C10 C50 C40 107.0(4) . . ?
C10 C50 C51 124.9(5) . . ?
C40 C50 C51 127.7(5) . . ?
C10 C50 Ru1 71.7(3) . . ?
C40 C50 Ru1 72.3(3) . . ?
C51 C50 Ru1 127.2(4) . . ?
C50 C51 H51A 109.5 . . ?
C50 C51 H51B 109.5 . . ?
H51A C51 H51B 109.5 . . ?
C50 C51 H51C 109.5 . . ?
H51A C51 H51C 109.5 . . ?
H51B C51 H51C 109.5 . . ?
O1 C60 O2 117.2(4) . . ?
O1 C60 C61 120.3(5) . . ?
O2 C60 C61 122.5(5) . . ?
O1 C60 Ru1 58.8(2) . . ?
O2 C60 Ru1 58.4(2) . . ?
C61 C60 Ru1 179.1(5) . . ?
C60 C61 H61A 109.5 . . ?
C60 C61 H61B 109.5 . . ?
H61A C61 H61B 109.5 . . ?
C60 C61 H61C 109.5 . . ?
H61A C61 H61C 109.5 . . ?
H61B C61 H61C 109.5 . . ?
 
